# Supplementary material for: Optimization of synthetic parameters of high-purity trifunctional mercaptoesters and their curing behavior for the thiol–epoxy click reaction
Source: Royal Society of Chemistry journal article supplement (doi:10.1039/d1ra05981e), 2021-01-01
Supplement: d1ra05981e1.pdf [file d1ra05981e1.pdf]

**Supporting Information for;**

**Optimization of Synthetic Parameters of High-purity  
Trifunctional Mercaptoesters and Their Curing Behavior for  
Thiol-epoxy Click Reaction**

**Seung-Mo Hong, Oh Young Kim and Seok-Ho Hwang\***

Materials Chemistry & Engineering Laboratory, School of Polymer System Engineering,  
Dankook University, Yongin, Gyeonggi-do 16890, Republic of Korea

\*To whom the correspondence should be addressed. E-mail: *bach@dankook.ac.kr*

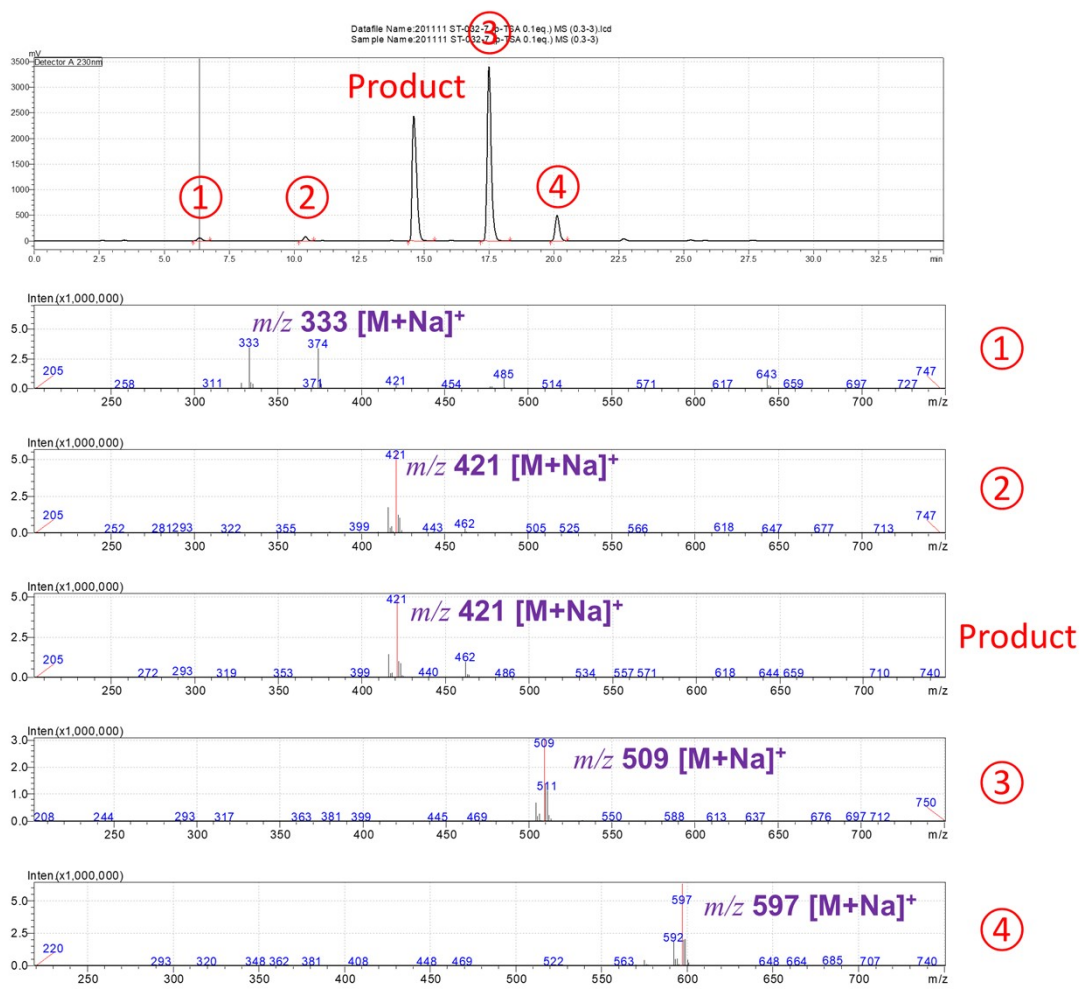

**Figure S1.** HPLC chromatograms and mass spectra for eluted peaks of TMPMP sample.

**Table S1.** Chemical structure and chemical name that correspond to the HPLC trace.

| Peak | Chemical structure                                                                  | Chemical name                                                                                                     |
|------|-------------------------------------------------------------------------------------|-------------------------------------------------------------------------------------------------------------------|
| (a)  | 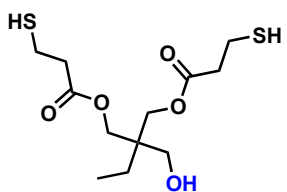   | 2-ethyl-2-(hydroxymethyl)propane-1,3-diyl <i>bis</i> (3-mercaptopropanoate)                                       |
| (b)  |    | 2-(hydroxymethyl)-2-(((3-((3-mercaptopropanoyl)thio)propanoyl)oxy)methyl)butyl 3-mercaptopropanoate               |
| (c)  |   | trimethylolpropane- <i>tris</i> (3-mercaptopropanoate)                                                            |
| (d)  |  | 2-ethyl-2-(((3-((3-mercaptopropanoyl)thio)propanoyl)oxy)methyl)propane-1,3-diyl <i>bis</i> (3-mercaptopropanoate) |
| (e)  |  | 2-ethyl-2-(((3-mercaptopropanoyl)oxy)methyl)propane-1,3-diyl <i>bis</i> (3-((3-mercaptopropanoyl)thio)propanoate) |

## Reaction 1

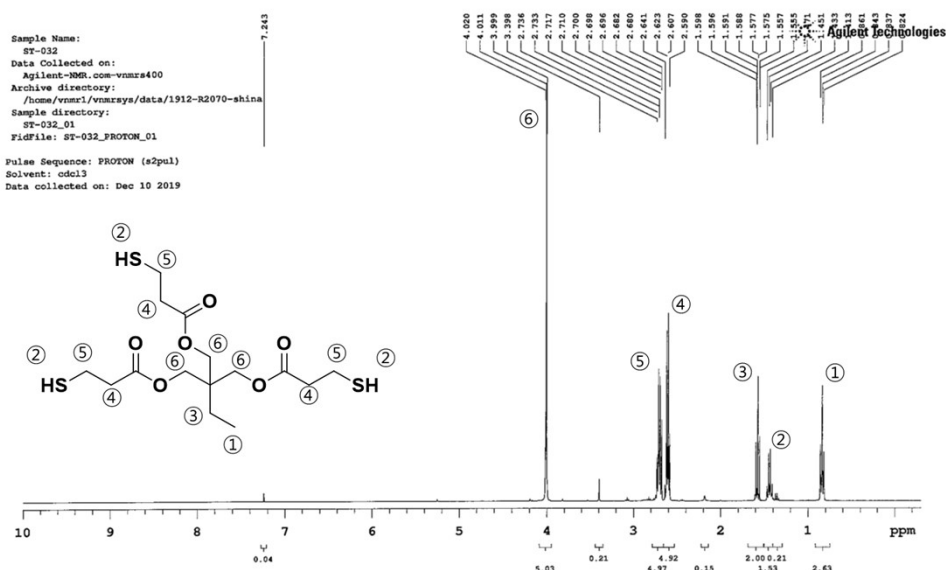

## Reaction 2

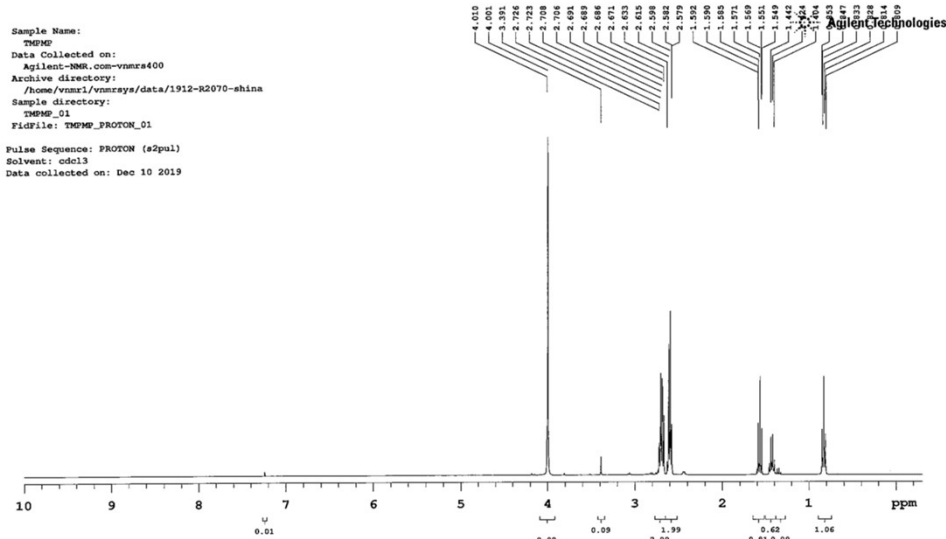

Figure S2. <sup>1</sup>H NMR spectra for crude products through direct esterification reactions (entry preEXP-1 and preEXP-2).

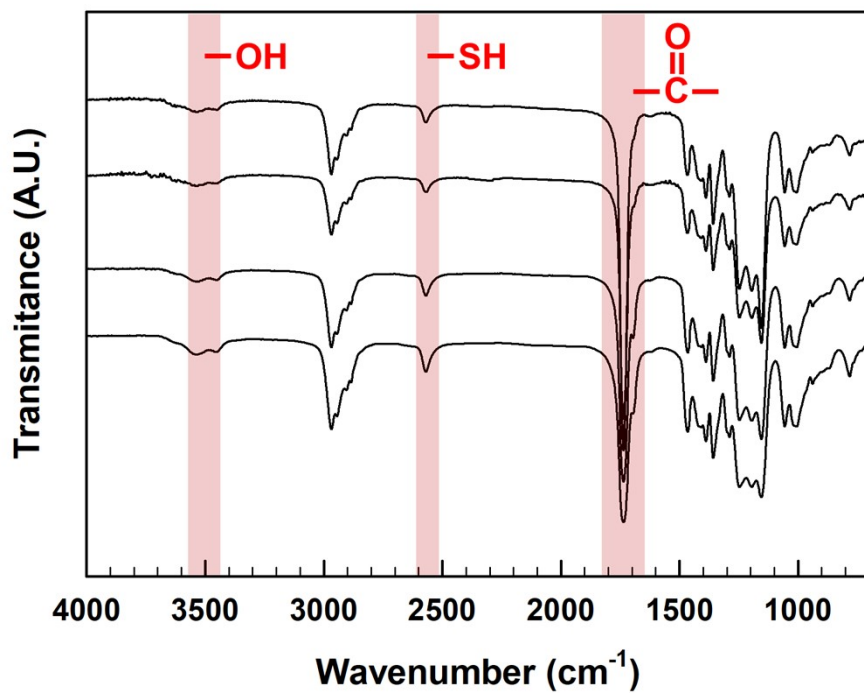

**Figure S3.** FT-IR spectra for crude product through direct esterification preliminary reactions (entry preEXP-1 ~ preEXP-4).

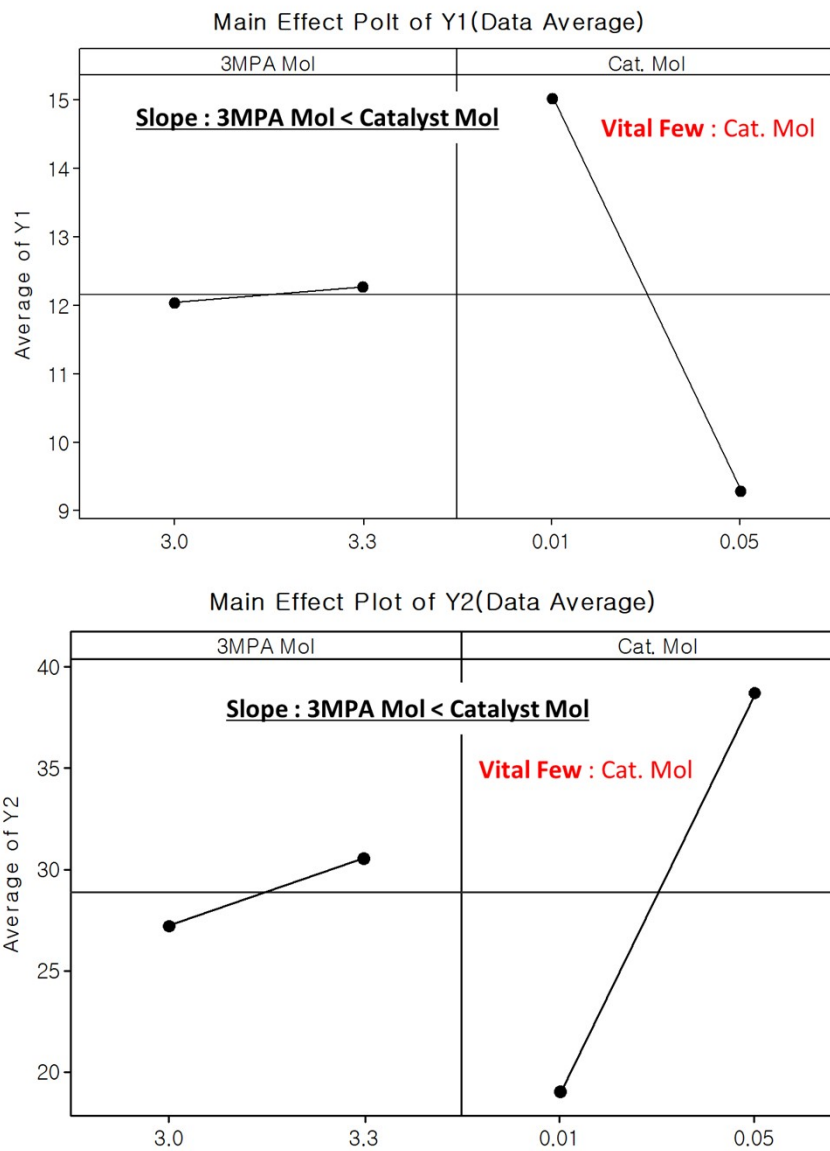

**Figure S4.** Synthesis parameters for the direct esterification reaction depending on reactant ratio and acid catalyst concentration.

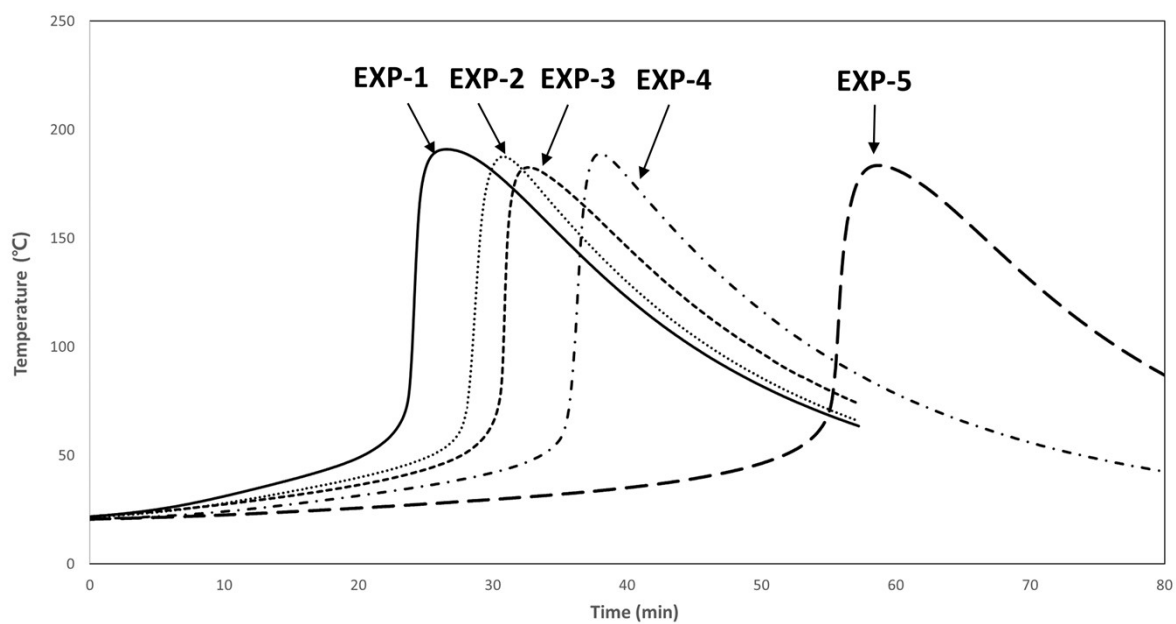

**Figure S5.** Thermograms corresponding to curing behavior for TMPMP-epoxy mixture with base catalyst.
